# Supplementary material for: ExpLOring the role of the intestinal MiCrobiome in InflammATory bowel disease-AssocIated SpONdylarthritis (LOCATION-IBD)
Source: PubMed Central journal article supplement — Heliyon. 2024 Feb 18;10(4):e26571. doi: 10.1016/j.heliyon.2024.e26571 (PMC10900801; doi:10.1016/j.heliyon.2024.e26571), 2024-02-18
Supplement: mmc1.pdf [file mmc1.pdf]

**On a scale of 1-10, 10 being most severe, how would you rate your pain:**

|                              | 1                     | 2                     | 3                     | 4                     | 5                     | 6                     | 7                     | 8                     | 9                     | 10                    |
|------------------------------|-----------------------|-----------------------|-----------------------|-----------------------|-----------------------|-----------------------|-----------------------|-----------------------|-----------------------|-----------------------|
| On most days (daily average) | <input type="radio"/> |
| On your worst days           | <input type="radio"/> |

How long does your joint pain last after you wake up?

- 15 minutes or less  
 15 to 30 minutes  
 30 to 60 minutes  
 60-120 minutes (1-2 hours)  
 120+ minutes (2 hrs or more)

**When your joint pain is bothering you, do you have any trouble performing the following activities of daily living:**

|                            | Yes                   | No                    |
|----------------------------|-----------------------|-----------------------|
| Bathing                    | <input type="radio"/> | <input type="radio"/> |
| Dressing                   | <input type="radio"/> | <input type="radio"/> |
| Toileting                  | <input type="radio"/> | <input type="radio"/> |
| Preparing meals and eating | <input type="radio"/> | <input type="radio"/> |

**Which of your joints are affected by pain and swelling (select all that apply)?**

|            | Left                     | Right                    |
|------------|--------------------------|--------------------------|
| Back/spine | <input type="checkbox"/> | <input type="checkbox"/> |
| Shoulder   | <input type="checkbox"/> | <input type="checkbox"/> |
| Fingers    | <input type="checkbox"/> | <input type="checkbox"/> |
| Wrists     | <input type="checkbox"/> | <input type="checkbox"/> |
| Ankles     | <input type="checkbox"/> | <input type="checkbox"/> |
| Feet       | <input type="checkbox"/> | <input type="checkbox"/> |
| Knees      | <input type="checkbox"/> | <input type="checkbox"/> |
| Elbows     | <input type="checkbox"/> | <input type="checkbox"/> |
| Hip        | <input type="checkbox"/> | <input type="checkbox"/> |

Number of involved fingers:

- One finger  
 Multiple fingers

Is your joint pain worse with active GI symptoms?

- Yes  
 No

Is there any activity you can't do because of your joint pain?

\_\_\_\_\_

Which of the following best describes your disease activity within last 6 months:

- 0-I was well in the past 6 months - what I consider remission  
 1-Rarely active, giving me symptoms only a few days of the past 6 months  
 2-Occasionally active, giving me symptoms 1-2 days per month  
 3-Sometimes active, giving me symptoms on some days  
 4-Often active, giving me symptoms most days  
 5-Constantly active, giving me symptoms every day

**Please check all of the following foods that you consume:**

|                                                                          | 1-2x/wk               | 3-5x/wk               | Daily                 | Multiple times daily  |
|--------------------------------------------------------------------------|-----------------------|-----------------------|-----------------------|-----------------------|
| Dairy                                                                    | <input type="radio"/> | <input type="radio"/> | <input type="radio"/> | <input type="radio"/> |
| Red meat (hamburger/ground beef, steak, lamb, etc)                       | <input type="radio"/> | <input type="radio"/> | <input type="radio"/> | <input type="radio"/> |
| Poultry (chicken, turkey, etc)                                           | <input type="radio"/> | <input type="radio"/> | <input type="radio"/> | <input type="radio"/> |
| Seafood (shrimp, fish, etc)                                              | <input type="radio"/> | <input type="radio"/> | <input type="radio"/> | <input type="radio"/> |
| Added sugars (soda, sweet tea, cookie/cake, jams, etc)                   | <input type="radio"/> | <input type="radio"/> | <input type="radio"/> | <input type="radio"/> |
| Refined grains (white bread/rice/pasta etc)                              | <input type="radio"/> | <input type="radio"/> | <input type="radio"/> | <input type="radio"/> |
| Whole grains (wheat bread, brown rice/pasta, oatmeal, quinoa, bran, etc) | <input type="radio"/> | <input type="radio"/> | <input type="radio"/> | <input type="radio"/> |
| Green vegetables                                                         | <input type="radio"/> | <input type="radio"/> | <input type="radio"/> | <input type="radio"/> |
| Fruits and other vegetables                                              | <input type="radio"/> | <input type="radio"/> | <input type="radio"/> | <input type="radio"/> |

**Consider the following symptoms, noting only ones that have been experienced need to be selected:**

|                                                                                       | I HAVE experienced this symptom at some point, or has a doctor told me I've had this symptom | I have experience this symptom in the past 3 months |
|---------------------------------------------------------------------------------------|----------------------------------------------------------------------------------------------|-----------------------------------------------------|
| Uveitis or episcleritis (inflammatory eye symptom: eye pain, light sensitivity, etc.) | <input type="radio"/>                                                                        | <input type="radio"/>                               |
| Oral (aphthous ulcers)                                                                | <input type="radio"/>                                                                        | <input type="radio"/>                               |
| Erythema Nodosum (painful, red nodules on your skin)                                  | <input type="radio"/>                                                                        | <input type="radio"/>                               |
| Pyoderma Gangrenosum (ulcers on skin)                                                 | <input type="radio"/>                                                                        | <input type="radio"/>                               |
| Anal skin tags                                                                        | <input type="radio"/>                                                                        | <input type="radio"/>                               |
| Perianal fistula                                                                      | <input type="radio"/>                                                                        | <input type="radio"/>                               |
| Other (please describe below)                                                         | <input type="radio"/>                                                                        | <input type="radio"/>                               |

Please describe other extra-intestinal manifestations of IBD you have experienced:

\_\_\_\_\_

Please list all medications and supplements you're currently taking, with dosages and frequency included:

\_\_\_\_\_

**On a scale of 1-10, 10 being most stressed, how would you rate your stress levels:**

|                           | 1                     | 2                     | 3                     | 4                     | 5                     | 6                     | 7                     | 8                     | 9                     | 10                    |
|---------------------------|-----------------------|-----------------------|-----------------------|-----------------------|-----------------------|-----------------------|-----------------------|-----------------------|-----------------------|-----------------------|
| On a typical day          | <input type="radio"/> |
| When you're most stressed | <input type="radio"/> |
